# Supplementary material
Source: PubMed Central journal article supplement (PMC3017217)
Supplement: NIHMS229924-supplement-1_si_001.pdf [file NIHMS229924-supplement-1_si_001.pdf]

### Supplementary Information

Substrate affinity of photosensitizers derived from chlorophyll-a: The ABCG2 transporter affects the phototoxic response of side population stem cell-like cancer cells to photodynamic therapy.

Janet Morgan, Jennifer D. Jackson, Xiang Zheng, Suresh K. Pandey and Ravindra K. Pandey.

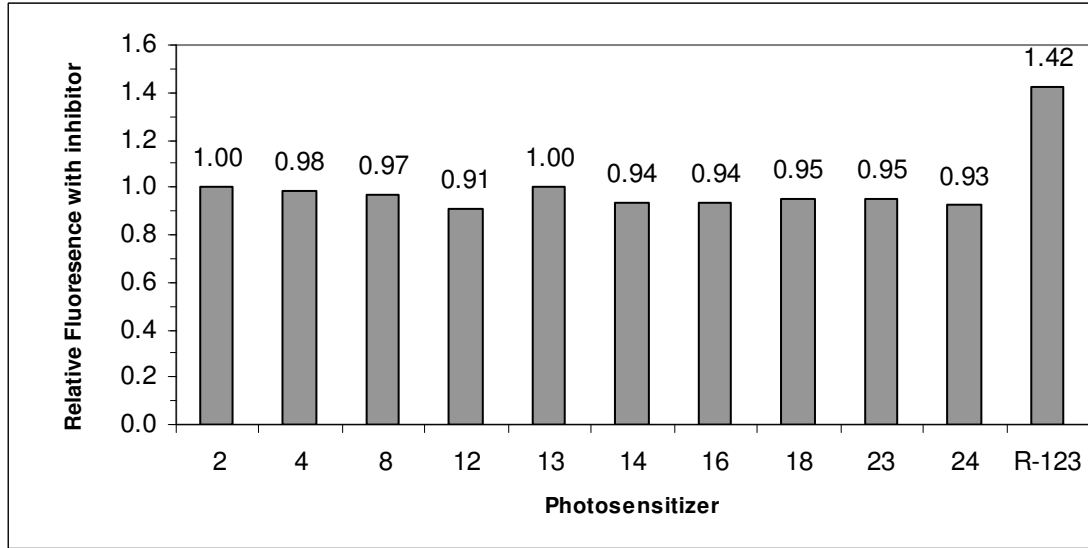

**Figure 1.** Relative fluorescence of photosensitizers incubated for 30 minutes in HL60 VCR Pgp (ABCB1) expressing cells with 0.1  $\mu$ M rhodamine 123 (R-123) in the presence or absence of inhibitor verapamil at 100  $\mu$ M. The Pgp substrate R-123 was retained at a higher level in the presence of the inhibitor. All the chlorin and purpurinimide conjugates which showed no differential fluorescence indicating that they were non-substrates of Pgp. Fluorescence was measured by Flow Cytometry.

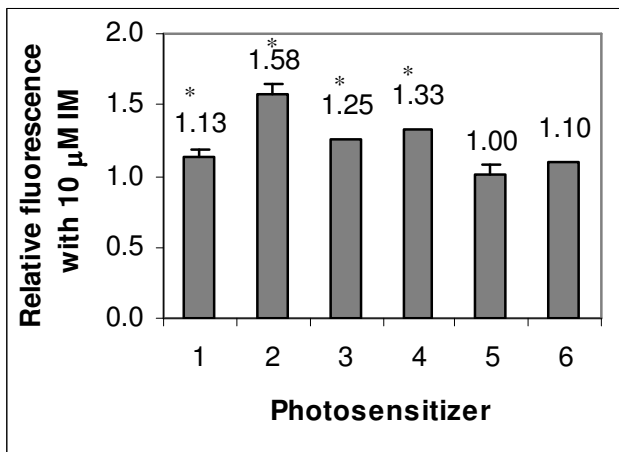

**Figure 2.** The effect mediated by the TKI IM on fluorescence in RIF cells (■) produced by photosensitizers related to pyropheophorbide-a (PhA) with different groups attached to the macrocycle, as indicated in Chart 1. Bars are mean $\pm$  SEM of 2-5 experiments with triplicate samples for each compound. \*Significant change in fluorescence due to IM,  $P < 0.05$ .

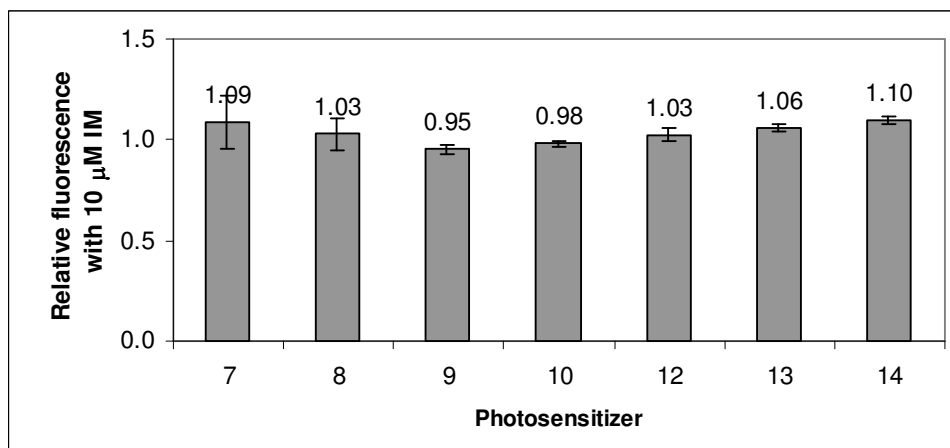

**Figure 3.** Carbohydrate substitutions on HPPH. The effect mediated by the TKI IM on fluorescence in RIF cells (■) produced by HPPH with different groups attached to the macrocycle, as indicated in Chart 2. Bars are mean $\pm$  SEM of 1-3 experiments with triplicate samples for each compound.

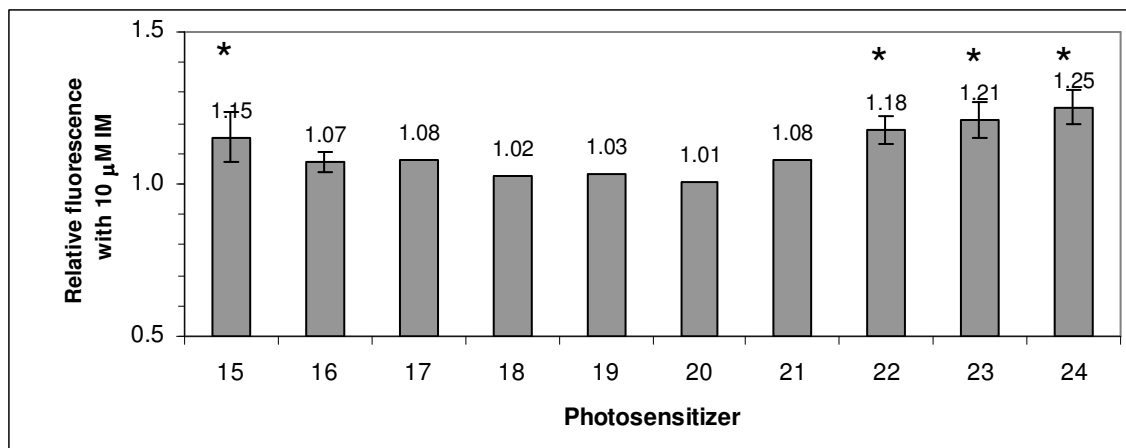

**Figure 4.** The effect mediated by the TKI IM on fluorescence produced in RIF cells (■) by purpurinimides (**15** and **22**) with lactose attached at different positions of the macrocycle (**16-21**), and glucose (**23**) or galactose (**24**) attached at position 3 as indicated in Charts 3 and 4. Bars are mean $\pm$  SEM of 2-3 experiments with triplicate samples for each compound. \*Significant change in fluorescence due to IM,  $P < 0.05$
